# Supplementary material
Source: PubMed Central journal article supplement (PMC5013803)
Supplement: rspb20161501supp1.pdf [file rspb20161501supp1.pdf]

## Sea urchins in a high-CO<sub>2</sub> world: the influence of acclimation on the immune response to ocean warming and acidification

C.J. Brothers\*, J. Harianto, J.B. McClintock, M. Byrne

\*Corresponding author: brotce@uab.edu

*Proceedings of the Royal Society B: Biological Sciences*

---

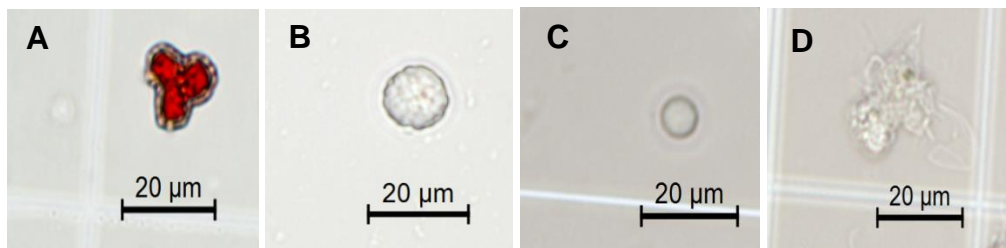

**Figure S1.** Types of coelomocytes collected from the coelomic fluid of *Heliocidaris erythrogramma*. A) red amoebocyte B) white amoebocyte C) vibratile cell D) phagocyte (petalloid).

**Table S1.** Temperature (°C) and pH<sub>NIST</sub> ( $\bar{x} \pm SE$ ) for experimental treatments (n = 5 per treatment) once target conditions were reached. Measurements were taken daily in each aquarium containing *Heliocidaris erythrogramma* (n = 20).

| Treatment      | 1 Day           |                | 15 Days         |                | 30 Days         |                |
|----------------|-----------------|----------------|-----------------|----------------|-----------------|----------------|
|                | Temperature     | pH             | Temperature     | pH             | Temperature     | pH             |
| 17°C / pH 8.15 | 17.04<br>(0.05) | 8.15<br>(0.01) | 16.96<br>(0.18) | 8.17<br>(0.03) | 17<br>(0.15)    | 8.17<br>(0.02) |
| 17°C / pH 7.6  | 17.04<br>(0.09) | 7.64<br>(0.01) | 17.02<br>(0.08) | 7.58<br>(0.06) | 17.02<br>(0.08) | 7.6<br>(0.05)  |
| 23°C / pH 8.15 | 23.02<br>(0.13) | 8.16<br>(0.01) | 22.88<br>(0.35) | 8.16<br>(0.14) | 22.92<br>(0.27) | 8.17<br>(0.21) |
| 23°C / pH 7.6  | 23.00<br>(0.12) | 7.61<br>(0.02) | 22.87<br>(0.37) | 7.62<br>(0.03) | 22.94<br>(0.29) | 7.62<br>(0.03) |

**Table S2.** Seawater carbonate system parameters ( $\bar{x} \pm \text{SE}$ ) for 4 experimental temperature and pH treatments.  $p\text{CO}_2$  ( $\mu\text{atm}$ ),  $\Omega_{\text{Ca}}$ , and  $\Omega_{\text{Ar}}$  values were determined from  $\text{pH}_{\text{NIST}}$ , temperature, salinity, and total alkalinity ( $n = 5$ ) using CO2SYS (Pierrot, 2006).

|                      | pH 8.1.5         |                  | pH 7.6             |                   |
|----------------------|------------------|------------------|--------------------|-------------------|
|                      | 17°C             | 23°C             | 17°C               | 23°C              |
| $p\text{CO}_2$       | 389.72<br>(1.97) | 399.00<br>(2.94) | 1683.97<br>(17.23) | 1681.87<br>(9.66) |
| $\Omega_{\text{Ca}}$ | 3.98<br>(0.01)   | 4.70<br>(0.02)   | 1.24<br>(0.01)     | 1.56<br>(0.01)    |
| $\Omega_{\text{Ar}}$ | 2.57<br>(0.01)   | 3.08<br>(0.01)   | 0.80<br>(0.01)     | 1.02<br>(0.00)    |

**Table S3.** Types of coelomocytes contributing to the dissimilarity in cell counts of coelomic fluid collected from *Heliocidaris erythrogramma* exposed to temperature and pH treatments for 1 day (n = 5 per treatment).

| <b>Treatment</b> | <b>Average Dissimilarity (%)</b> | <b>Type of Coelomocyte</b> | <b>Cumulative Contribution to Dissimilarity (%)</b> |
|------------------|----------------------------------|----------------------------|-----------------------------------------------------|
| 17°C / pH 8.15   | 16.45                            | White                      | 44.78                                               |
| vs.              |                                  | Phagocytes                 | 72.98                                               |
| 17°C / pH 7.6    |                                  | Vibratile                  | 87.8                                                |
|                  |                                  | Red                        | 100                                                 |
| 17°C / pH 8.15   | 20.97                            | White                      | 39.74                                               |
| vs.              |                                  | Phagocytes                 | 69                                                  |
| 23°C / pH 8.15   |                                  | Red                        | 86.93                                               |
|                  |                                  | Vibratile                  | 100                                                 |
| 17°C / pH 8.15   | 20.15                            | White                      | 45.2                                                |
| vs.              |                                  | Phagocytes                 | 72.78                                               |
| 23°C / pH 7.6    |                                  | Vibratile                  | 93.05                                               |
|                  |                                  | Red                        | 100                                                 |
| 17°C / pH 7.6    | 17.07                            | White                      | 35.32                                               |
| vs.              |                                  | Phagocytes                 | 64.71                                               |
| 23°C / pH 8.15   |                                  | Vibratile                  | 82.62                                               |
|                  |                                  | Red                        | 100                                                 |
| 17°C / pH 7.6    | 12.75                            | Phagocytes                 | 36.38                                               |
| vs.              |                                  | White                      | 65.77                                               |
| 23°C / pH 7.6    |                                  | Vibratile                  | 87.35                                               |
|                  |                                  | Red                        | 100                                                 |
| 23°C / pH 8.15   | 22.39                            | White                      | 30.77                                               |
| vs.              |                                  | Phagocytes                 | 59.46                                               |
| 23°C / pH 7.6    |                                  | Vibratile                  | 83.35                                               |
|                  |                                  | Red                        | 100                                                 |

**Table S4.** Types of coelomocytes contributing to the dissimilarity in cell counts of coelomic fluid collected from *Heliocidaris erythrogramma* exposed to temperature and pH treatments for 15 days (n = 5 per treatment).

| <b>Treatment</b> | <b>Average Dissimilarity (%)</b> | <b>Type of Coelomocyte</b> | <b>Cumulative Contribution to Dissimilarity (%)</b> |
|------------------|----------------------------------|----------------------------|-----------------------------------------------------|
| 17°C / pH 8.15   | 13.33                            | Vibratile                  | 30.73                                               |
| vs.              |                                  | Phagocytes                 | 57.86                                               |
| 17°C / pH 7.6    |                                  | White                      | 83.06                                               |
|                  |                                  | Red                        | 100                                                 |
| 17°C / pH 8.15   | 15.63                            | Vibratile                  | 37.66                                               |
| vs.              |                                  | Phagocytes                 | 60.88                                               |
| 23°C / pH 8.15   |                                  | White                      | 83.12                                               |
|                  |                                  | Red                        | 100                                                 |
| 17°C / pH 8.15   | 18.91                            | White                      | 29.62                                               |
| vs.              |                                  | Phagocytes                 | 57.39                                               |
| 23°C / pH 7.6    |                                  | Vibratile                  | 82.63                                               |
|                  |                                  | Red                        | 100                                                 |
| 17°C / pH 7.6    | 17.13                            | Vibratile                  | 40.16                                               |
| vs.              |                                  | White                      | 65.11                                               |
| 23°C / pH 8.15   |                                  | Phagocytes                 | 89.98                                               |
|                  |                                  | Red                        | 100                                                 |
| 17°C / pH 7.6    | 19.36                            | White                      | 37.96                                               |
| vs.              |                                  | Vibratile                  | 67.8                                                |
| 23°C / pH 7.6    |                                  | Phagocytes                 | 92.12                                               |
|                  |                                  | Red                        | 100                                                 |
| 23°C / pH 8.15   | 17.30                            | White                      | 37.47                                               |
| vs.              |                                  | Phagocytes                 | 73.85                                               |
| 23°C / pH 7.6    |                                  | Vibratile                  | 90.97                                               |
|                  |                                  | Red                        | 100                                                 |

**Table S5.** Types of coelomocytes contributing to the dissimilarity in cell counts of coelomic fluid collected from *Heliocidaris erythrogramma* exposed to temperature and pH treatments for 30 days (n = 5 per treatment).

| <b>Treatment</b> | <b>Average Dissimilarity (%)</b> | <b>Type of Coelomocyte</b> | <b>Cumulative Contribution to Dissimilarity (%)</b> |
|------------------|----------------------------------|----------------------------|-----------------------------------------------------|
| 17°C / pH 8.15   | 45.78                            | Vibratile                  | 46.08                                               |
| vs.              |                                  | White                      | 90.71                                               |
| 17°C / pH 7.6    |                                  | Phagocyte                  | 95.61                                               |
|                  |                                  | Red                        | 100                                                 |
| 17°C / pH 8.15   | 47.60                            | Vibratile                  | 47.21                                               |
| vs.              |                                  | White                      | 85.92                                               |
| 23°C / pH 8.1    |                                  | Phagocyte                  | 96.89                                               |
|                  |                                  | Red                        | 100                                                 |
| 17°C / pH 8.15   | 48.27                            | Vibratile                  | 45.59                                               |
| vs.              |                                  | White                      | 85.78                                               |
| 23°C / pH 7.6    |                                  | Phagocyte                  | 94.69                                               |
|                  |                                  | Red                        | 100                                                 |
| 17°C / pH 7.6    | 17.75                            | White                      | 37.28                                               |
| vs.              |                                  | Phagocyte                  | 68.78                                               |
| 23°C / pH 8.1    |                                  | Vibratile                  | 89.99                                               |
|                  |                                  | Red                        | 100                                                 |
| 17°C / pH 7.6    | 18.08                            | White                      | 42.36                                               |
| vs.              |                                  | Vibratile                  | 67.67                                               |
| 23°C / pH 7.6    |                                  | Phagocyte                  | 89.4                                                |
|                  |                                  | Red                        | 100                                                 |
| 23°C / pH 8.1    | 20.33                            | White                      | 40.42                                               |
| vs.              |                                  | Phagocyte                  | 71.69                                               |
| 23°C / pH 7.6    |                                  | Vibratile                  | 90.15                                               |
|                  |                                  | Red                        | 100                                                 |

**References:**

Pierrot D, Lewis E, Wallace D. MS Excel program developed for CO<sub>2</sub> system calculations. ORNL/CDIAC-105a Carbon Dioxide Information Analysis Center, Oak Ridge National Laboratory, US Department of Energy, Oak Ridge, Tennessee. 2006.
